# Supplementary material
Source: Springer Nature journal article supplement (https://www.springermedizin.de/resource/supplementary/12960_2013_457_MOESM1_ESM.pdf/9570130)
Supplement: MOESM1 [file 9570130]

Village Health Committee

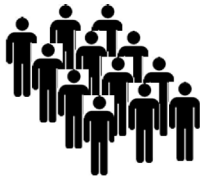

Level One Care Unit  
(Community Unit)

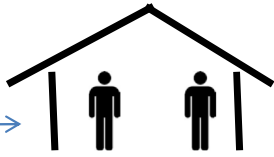

CHEWs (1-2 per  
population of 5000)

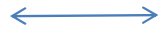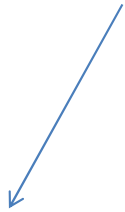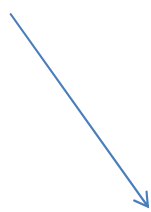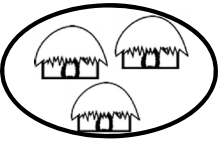

1 CHW per 20  
Households

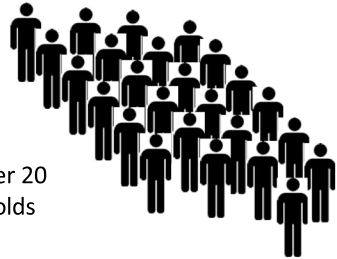

25 CHWs per 1  
CHEW

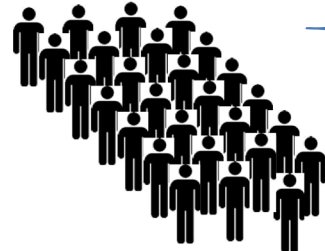

25 CHWs per 1  
CHEW

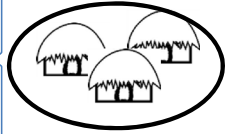

1 CHW per 20  
Households
